# Supplementary material for: Cholestatic Liver Disease and Pregnancy: A Systematic Review and Meta-Analysis
Source: MDPI journal article supplement (doi:10.3390/jcm11041068), 2022-02-18
Supplement: s1 [file s1]

## Supplementary Material

Table S1. Search strategy

|                                                                                                                                                                                                                                                                                                             |
|-------------------------------------------------------------------------------------------------------------------------------------------------------------------------------------------------------------------------------------------------------------------------------------------------------------|
| <b>PubMed</b>                                                                                                                                                                                                                                                                                               |
| ("Liver cirrhosis, Biliary"[Mesh] OR "biliary liver cirrhosis"[tiab] OR "primary biliary cholangitis"[tiab] OR "primary biliary cirrhosis"[tiab] OR "cholestatic liver disease"[tiab] OR "PBC"[tiab] OR "Cholangitis, Sclerosing"[Mesh] OR "Primary sclerosing cholangitis"[tw] OR "PSC"[tiab])             |
| AND                                                                                                                                                                                                                                                                                                         |
| ("Pregnancy"[MeSH] OR Pregnancy[tw] OR pregnant[tw] OR "Pregnant Women"[MeSH] OR "Pregnant Women"[tw] OR "Pregnant Woman"[tw] OR gestation[tw] OR "gravidity"[MeSH] OR gravidity[tw])                                                                                                                       |
| AND                                                                                                                                                                                                                                                                                                         |
| ("Pregnancy Outcome"[MeSH] OR "pregnancy outcome*"[tiab] OR "Pregnancy Complications"[MeSH] OR "pregnancy complication*"[tiab] OR "Treatment Outcome"[MeSH] OR "treatment outcome*"[tiab] OR "infant, newborn"[MeSH] OR "newborn"[tiab] or "infant"[tiab])                                                  |
| <b>EMBASE</b>                                                                                                                                                                                                                                                                                               |
| "biliary cirrhosis"/exp OR "biliary cirrhosis" OR "primary biliary cirrhosis"/exp OR "primary biliary cirrhosis" OR "cholestatic liver disease"/exp OR "cholestatic liver disease" OR "sclerosing cholangitis"/exp OR "sclerosing cholangitis"                                                              |
| AND                                                                                                                                                                                                                                                                                                         |
| "pregnancy"/exp OR "pregnancy" OR "pregnant woman"/exp OR "pregnant woman"                                                                                                                                                                                                                                  |
| <b>Web of Science</b>                                                                                                                                                                                                                                                                                       |
| TS=("biliary liver cirrhosis" OR "primary biliary cholangitis" OR "primary biliary cirrhosis" OR "cholestatic liver disease" OR "PBC" OR "sclerosing cholangitis" OR "primary sclerosing cholangitis" OR "PSC")                                                                                             |
| AND                                                                                                                                                                                                                                                                                                         |
| TS=("pregnancy" OR "pregnant" OR "pregnant women" OR "pregnant woman" OR "gestation" OR "gravidity")                                                                                                                                                                                                        |
| <b>Cochrane Reviews</b>                                                                                                                                                                                                                                                                                     |
| MeSH descriptor: [Liver Cirrhosis, Biliary] explode all trees OR MeSH descriptor: [Cholangitis, Sclerosing] explode all trees OR "biliary liver cirrhosis" OR "primary biliary cholangitis" OR "primary biliary cirrhosis" OR "cholestatic liver disease" OR PBC OR "primary sclerosing cholangitis" OR PSC |
| AND                                                                                                                                                                                                                                                                                                         |
| MeSH descriptor: [Pregnancy] explode all trees OR MeSH descriptor: [Pregnant Women] explode all trees OR MeSH descriptor: [Gravidity] explode all trees OR pregnancy OR pregnant OR "pregnant women" OR "pregnant woman" OR gestation OR gravidity                                                          |

**Table S2. Diagnostic criteria of Primary Biliary cholangitis and Primary Sclerosing Cholangitis based on AASL and EASL guidelines**

| <b>PBC</b>       |                                                                                                                                                                                                                                                                                                                                                                                                                                                   |
|------------------|---------------------------------------------------------------------------------------------------------------------------------------------------------------------------------------------------------------------------------------------------------------------------------------------------------------------------------------------------------------------------------------------------------------------------------------------------|
|                  | A diagnosis of PBC per AASLD guidelines is established when two of the following three findings are present:                                                                                                                                                                                                                                                                                                                                      |
| AASLD guidelines | <ol style="list-style-type: none"> <li>(1) Elevated serum alkaline phosphatase (ALP),</li> <li>(2) Presence of antimitochondrial antibody (AMA) or other autoantibodies (anti-sp100 or anti-gp210)</li> <li>(3) If AMA is negative, then subsequent liver biopsy showing nonsuppurative biliary ductal destruction.</li> </ol>                                                                                                                    |
|                  | PBC equates to at least two of the following:                                                                                                                                                                                                                                                                                                                                                                                                     |
| EASL guidelines  | <ol style="list-style-type: none"> <li>(1) ALP <math>\geq 2\times</math> upper limit of normal (ULN) or GGT <math>&gt;5\times</math> ULN;</li> <li>(2) AMA titer <math>&gt;1:40</math>;</li> <li>(3) Florid bile duct lesion on histology.</li> </ol>                                                                                                                                                                                             |
| <b>PSC</b>       |                                                                                                                                                                                                                                                                                                                                                                                                                                                   |
|                  | A diagnosis of PSC is made when patients with abnormal cholestatic liver tests have:                                                                                                                                                                                                                                                                                                                                                              |
| AASLD guidelines | <ul style="list-style-type: none"> <li>• Multifocal strictures in the intra-, and extra-hepatic bile ducts, as well as segmental dilations on cholangiography (magnetic resonance cholangiography, endoscopic retrograde cholangiography, or percutaneous cholangiography), and secondary causes of sclerosing cholangitis have been ruled out.</li> <li>• Histological confirmation is needed in patients with normal cholangiograms.</li> </ul> |
|                  | A diagnosis of PSC is made in patients with                                                                                                                                                                                                                                                                                                                                                                                                       |
| EASL guidelines  | <ul style="list-style-type: none"> <li>• Elevated serum markers of cholestasis not otherwise explained,</li> <li>• When magnetic resonance cholangiopancreatography (MRCP) or endoscopic cholangiopancreatography (ERCP) show characteristic bile duct changes with multifocal strictures and segmental dilatations,</li> <li>• And causes of secondary sclerosing cholangitis and other cholestatic disorders are excluded.</li> </ul>           |

PBC—Primary biliary cholangitis; PSC—Primary sclerosing cholangitis; AASLD— American Association for the Study of Liver Diseases; EASL— European Association for the Study of the Liver.

**Table S3. Excluded studies**

| Study                                                                                                                                                                                                                                                                                                                            | Reason for exclusion                                   |
|----------------------------------------------------------------------------------------------------------------------------------------------------------------------------------------------------------------------------------------------------------------------------------------------------------------------------------|--------------------------------------------------------|
| Matsumori, A.; Yoneda, S.; Kojima, H.; An, S.; Uemura, M.; Fukui, H.; Yamane, Y.; Nishimura, K.; Yoshikawa, M. A Case of Primary Biliary Cirrhosis Generated during Pregnancy. J. Nara Med. Assoc. 2003, 54 (4), 257–262.                                                                                                        | Case Report <3 Patients                                |
| Mizuno, M.; Kohda, H.; Kanai, M.; Murazumi, K.; Ohta, H.; Uehara, S.; Ishikawa, Y.; Hasebe, C.; Ono, M.; et al. A CASE OF PRIMARY BILIARY CIRRHOSIS WHICH DEVELOPED AFTER THIRD DELIVERY. Gastroenterol. Endosc. 1988, 30 (11), 2652–2658.                                                                                       | Case Report <3 Patients<br>Article Is in Japanese      |
| Mizuno, S.; Ueno, T.; Simasaki, H.; Yasuhara, S.; Takeda, R.; Nakanuma, Y. [A Case of Primary Biliary Cirrhosis, Manifested by Pregnancy]. Nihon Shokakibyo Gakkai Zasshi 1985, 82 (10), 2642–2646.                                                                                                                              | Case Report <3 Patients<br>Article Is in Japanese      |
| Siva, S.; Muchero, R.; Nangrahary, M.; Senaratne, S. An Unusual Case of Liver Disease in Pregnancy. Aust. N. Z. J. Obstet. Gynaecol. 2018, 58, 76. <a href="https://doi.org/10.1111/ajo.12874">https://doi.org/10.1111/ajo.12874</a> .                                                                                           | Case Report <3 Patients                                |
| Parikh-Patel, A.; Gold, E. B.; Utts, J. M.; Gershwin, M. E. Association between Parity and Primary Biliary Cirrhosis. Am. J. Epidemiol. 2001, 153 (11), S138–S138.                                                                                                                                                               | Wrong Outcomes: does not specify if pregnancy occurred |
| Varma, R. R. Course and Prognosis of Pregnancy in Women with Liver Disease. Semin Liver Dis 1987, 7 (1), 59–66. <a href="https://doi.org/10.1055/s-2008-1040565">https://doi.org/10.1055/s-2008-1040565</a> .                                                                                                                    | Review Article                                         |
| Bouldouyre, M. A.; Dauphin, H.; Cherradou, N.; Gros, H. [Establishment and One-Year Evaluation of an Internal Medicine Consultation in a Maternity]. Sante Publique (Bucur.) 2018, 30 (5), 671–677. <a href="https://doi.org/10.3917/spub.186.0671">https://doi.org/10.3917/spub.186.0671</a> .                                  | Article in French                                      |
| Frise, C. J.; Williamson, C. Gastrointestinal and Liver Disease in Pregnancy. Clin. Med. J. R. Coll. Physicians Lond. 2013, 13 (3), 269–274. <a href="https://doi.org/10.7861/clinmedicine.13-3-269">https://doi.org/10.7861/clinmedicine.13-3-269</a> .                                                                         | Review Article                                         |
| Matsubara, S.; Isoda, N.; Taniguchi, N. Jaundice as the First Manifestation of Primary Biliary Cirrhosis during Pregnancy: Measurement of Portal Vein Blood Flow. J Obstet Gynaecol Res 2011, 37 (7), 963–964. <a href="https://doi.org/10.1111/j.1447-0756.2011.01645.x">https://doi.org/10.1111/j.1447-0756.2011.01645.x</a>   | Case Report <3 Patients<br>Duplicate                   |
| Matsubara, S.; Isoda, N.; Taniguchi, N. Jaundice as the First Manifestation of Primary Biliary Cirrhosis during Pregnancy: Measurement of Portal Vein Blood Flow. J Obstet Gynaecol Res 2011, 37 (7), 963–964. <a href="https://doi.org/10.1111/j.1447-0756.2011.01645.x">https://doi.org/10.1111/j.1447-0756.2011.01645.x</a> . | Case Report <3 Patients<br>Duplicate                   |
| Mincis, M. Liver Diseases in Pregnancy. Rev. Bras. Med. 2004, 61 (11), 695–702.                                                                                                                                                                                                                                                  | Review Article<br>Article in Portuguese                |
| Nabhan, S.; Riely, C. A. Liver Diseases in Pregnancy. Article Seven in the Series. Pract. Gastroenterol. 1996, 20 (7), 14–37.                                                                                                                                                                                                    | Review Article                                         |
| Nir, A.; Sorokin, Y.; Abramovici, H.; Theodor, E. Pregnancy and Primary Biliary Cirrhosis. Int J Gynaecol Obstet 1989, 28 (3), 279–282. <a href="https://doi.org/10.1016/0020-7292(89)90731-5">https://doi.org/10.1016/0020-7292(89)90731-5</a> .                                                                                | Case Report <3 Patients                                |
| Gossard, A. A.; Lindor, K. D. Pregnancy in a Patient with Primary Sclerosing Cholangitis. J Clin Gastroenterol 2002, 35 (4), 353–355. <a href="https://doi.org/10.1097/00004836-200210000-00014">https://doi.org/10.1097/00004836-200210000-00014</a> .                                                                          | Case Report <3 Patients                                |
| Hedri, A.; Dionysopoulou, A.; Lindner, C.; Macchiella, D.; Steetskamp, J.; Hasenburg, A. Pregnancy in a Patient with Primary Sclerosing Cholangitis. Geburtshilfe Frauenheilkd. 2018, 78 (10). <a href="https://doi.org/10.1055/s-0038-1671541">https://doi.org/10.1055/s-0038-1671541</a> .                                     | Case Report <3 Patients                                |
| Borhanmanesh, F.; Haghighi, P. Pregnancy in Patients with Cirrhosis of the Liver. Obstet Gynecol 1970, 36 (2), 315–324.                                                                                                                                                                                                          | Wrong patient population                               |
| Wong, K. K.; Goh, K. L. Pregnancy in Primary Biliary Cirrhosis. Eur J Obstet Gynecol Reprod Biol 1992, 45 (2), 149–151. <a href="https://doi.org/10.1016/0028-2243(92)90232-n">https://doi.org/10.1016/0028-2243(92)90232-n</a> .                                                                                                | Case Report <3 Patients                                |

|                                                                                                                                                                                                                                                                                                                                                                                                    |                                               |
|----------------------------------------------------------------------------------------------------------------------------------------------------------------------------------------------------------------------------------------------------------------------------------------------------------------------------------------------------------------------------------------------------|-----------------------------------------------|
| Goh, S. K.; Gull, S. E.; Alexander, G. J. Pregnancy in Primary Biliary Cirrhosis Complicated by Portal Hypertension: Report of a Case and Review of the Literature. <i>Bjog</i> 2001, 108 (7), 760–762. <a href="https://doi.org/10.1111/j.1471-0528.2001.00189.x">https://doi.org/10.1111/j.1471-0528.2001.00189.x</a> .                                                                          | Case Report <3 Patients                       |
| Ozdemir, O.; Karaahmet, F.; Sari, E.; Yakut, K.; Ertugrul, F. A.; Atalay, C. Preterm Birth Related to Post-Endoscopic Retrograde Cholangiopancreatography Pancreatitis in Pregnancy with Newly Diagnosed Primary Sclerosing Cholangitis. <i>J Obstet Gynaecol</i> 2015, 35 (3), 305–306. <a href="https://doi.org/10.3109/01443615.2014.948411">https://doi.org/10.3109/01443615.2014.948411</a> . | Case Report <3 Patients                       |
| Lopes, I. F.; Palma dos Reis, C. R.; Alves, M. J.; Calinas, F.; Borges, M. A. Primary Biliary Cholangitis: A Rare Diagnosis during Pregnancy. <i>Obstet. Med.</i> 2021. <a href="https://doi.org/10.1177/1753495X211008290">https://doi.org/10.1177/1753495X211008290</a> .                                                                                                                        | Case Report <3 Patients                       |
| Marpeau, L.; Benifla, J. L.; Chazoulliere, O.; Larue, L.; Pigne, A.; Poupon, R.; Barrat, J. Primary Biliary Cirrhosis (BPC) and Pregnancy. A Case Report. Review of the Literature. <i>J. Gynecol. Obstet. Biol. Reprod. (Paris)</i> 1991, 20 (6), 805–807.                                                                                                                                        | Case Report <3 Patients<br>Article in French  |
| Herijgers, P.; Van Coppenolle, L. Primary Biliary Cirrhosis and Pregnancy. <i>Tijdschr. Voor Geneesk.</i> 1991, 47 (5), 353–357.                                                                                                                                                                                                                                                                   | Foreign language without ability to interpret |
| Mantha, U.; Tebbutt, H. Primary Biliary Cirrhosis and Pregnancy. <i>J. Obstet. Gynaecol.</i> 1993, 13 (3), 177–178.                                                                                                                                                                                                                                                                                | Case Report <3 Patients                       |
| Pajares Villarroja, R.; Castillo Grau, P.; Manceñido Marcos, N.; Navajas León, F. J.; Hervías Cruz, D.; Erdozain Sosa, J. C.; Segura Cabral, J. M. Primary Biliary Cirrhosis and Pregnancy: Benefit of Ursodeoxycholic Acid Therapy [2]. <i>Gastroenterol Hepatol</i> 2003, 26 (9), 615. <a href="https://doi.org/10.1157/13054454">https://doi.org/10.1157/13054454</a> .                         | Foreign Language without Ability to Interpret |
| Pajares Villarroja, R.; Castillo Grau, P.; Manceñido Marcos, N.; Navajas León, F. J.; Hervías Cruz, D.; Erdozain Sosa, J. C.; Segura Cabral, J. M. [Primary Biliary Cirrhosis and Pregnancy: Benefit of Ursodeoxycholic Acid Therapy]. <i>Gastroenterol Hepatol</i> 2003, 26 (9), 615. <a href="https://doi.org/10.1016/s0210-5705(03)70416-6">https://doi.org/10.1016/s0210-5705(03)70416-6</a> . | Duplicate                                     |
| Marpeau, L.; Benifla, J. L.; Chazoullière, O.; Larue, L.; Pigné, A.; Poupon, R.; Barrat, J. [Primary Biliary Cirrhosis and Pregnancy. Apropos of a Clinical Case. Review of the Literature]. <i>J Gynecol Obstet Biol Reprod Paris</i> 1991, 20 (6), 805–807                                                                                                                                       | Case Report <3 Patients                       |
| Ducarme, G.; Bernuau, J.; Luton, D. [Primary Biliary Cirrhosis and Pregnancy]. <i>J Gynecol Obstet Biol Reprod Paris</i> 2014, 43 (5), 335–341. <a href="https://doi.org/10.1016/j.jgyn.2013.03.016">https://doi.org/10.1016/j.jgyn.2013.03.016</a> .                                                                                                                                              | Review Article                                |
| Rabinovitz, M.; Appasamy, R.; Finkelstein, S. Primary Biliary Cirrhosis Diagnosed during Pregnancy. Does It Have a Different Outcome? <i>Dig Sci</i> 1995, 40 (3), 571–574. <a href="https://doi.org/10.1007/bf02064371">https://doi.org/10.1007/bf02064371</a> .                                                                                                                                  | Case Report <3 Patients                       |
| Belloni, G.; Talamazzini, A.; Soldati, P. M.; Bernini, L.; Di Gennaro, F.; Bergamaschi, P. Primary Biliary Cirrhosis Risen in Pregnancy: A Case Report. <i>Med. - Riv. Della Encicl. Medica Ital.</i> 1990, 10 (1), 31–32.                                                                                                                                                                         | Case Report <3 Patients<br>Article in Italian |
| Belloni, G.; Talamazzini, A.; Soldati, P. M.; Bernini, L.; Di Gennaro, F.; Bergamaschi, P. [Primary Biliary Cirrhosis with Onset in Pregnancy: A Case Report]. <i>Med. Firenze</i> 1990, 10 (1), 31–32.                                                                                                                                                                                            | Duplicate                                     |
| Kammeijer, C. Q.; De Man, R. A.; De Groot, C. J. Primary Sclerosing Cholangitis and Pregnancy. <i>Clin Pr.</i> 2011, 1 (3), e55. <a href="https://doi.org/10.4081/cp.2011.e55">https://doi.org/10.4081/cp.2011.e55</a> .                                                                                                                                                                           | Review Article                                |
| Landon, M. B.; Soloway, R. D.; Freedman, L. J.; Gabbe, S. G. Primary Sclerosing Cholangitis and Pregnancy. <i>Obstet Gynecol</i> 1987, 69 (3 Pt 2), 457–460.                                                                                                                                                                                                                                       | Case Report <3 Patients                       |
| Leftwich, H.; Fang, Y. M. V.; Borgida, A.; Crombleholme, W. Primary Sclerosing Cholangitis in Pregnancy Refractory to Ursodeoxycholic Acid Treatment. <i>J. Reprod. Med. Obstet. Gynecol.</i> 2010, 55 (11–12), 517–519.                                                                                                                                                                           | Case Report <3 Patients                       |
| Leftwich, H.; Fang, Y. M.; Borgida, A.; Crombleholme, W. Primary Sclerosing Cholangitis in Pregnancy Refractory to Ursodeoxycholic Acid Treatment: A Case Report. <i>J Reprod Med</i> 2010, 55 (11–12), 517–519.                                                                                                                                                                                   |                                               |
| Christensen, K. L.; Andersen, B. N.; Vilstrup, H. [Primary Sclerosing Cholangitis with Itching Treated during Pregnancy with Ursodeoxycholic Acid]. <i>Ugeskr Laeger</i> 1997, 159 (48), 7151–7153.                                                                                                                                                                                                | Case Report <3 Patients<br>Article in Danish  |
| Christensen, K. L.; Andersen, B. N.; Vilstrup, H. Primary Sclerosing Cholangitis with Pruritis Treated during Pregnancy with Ursodeoxycholic Acid. <i>Ugeskr Laeger</i> 1997, 159 (48), 7151–7153.                                                                                                                                                                                                 | Duplicate                                     |
| Sujana Kumar, V.; Qumosani, K.; Taylor, T.; Sun, D. Primary Sclerosing Cholangitis: A New Case of Cirrhosis in Pregnancy. <i>Obstet. Med.</i> 2020. <a href="https://doi.org/10.1177/1753495X20972828">https://doi.org/10.1177/1753495X20972828</a> .                                                                                                                                              | Case Report <3 Patients                       |

|                                                                                                                                                                                                                                                                                                                  |                                               |
|------------------------------------------------------------------------------------------------------------------------------------------------------------------------------------------------------------------------------------------------------------------------------------------------------------------|-----------------------------------------------|
| Slade, L.; McKendrick, L.; Grivell, R. Primary Sclerosing Cholangitis: A Rare Cause of Liver Dysfunction in Pregnancy. <i>Obstet. Med.</i> 2021. <a href="https://doi.org/10.1177/1753495X21991406">https://doi.org/10.1177/1753495X21991406</a> .                                                               | Case Report <3 Patients                       |
| Ponce De Leon Hector, H.; Rodolfo, B.; Castelletto Roberto Argento Amalia-V, M.; Chopita Nestor, F. A. N. RELAPSING CHOLESTASIS OF PREGNANCY AND PRIMARY BILIARY CIRRHOSIS NONSUPPURATIVE DESTRUCTIVE CHRONIC CHOLANGITIS. <i>Acta Gastroenterol Latinoam</i> 1983, 13 (2), 210–211.                             | Foreign language without ability to interpret |
| Faulkes, R. E.; Chauhan, A.; Knox, E.; Johnston, T.; Thompson, F.; Ferguson, J. Review Article: Chronic Liver Disease and Pregnancy. <i>Aliment. Pharmacol. Ther.</i> 2020, 52 (3), 420–429. <a href="https://doi.org/10.1111/apt.15908">https://doi.org/10.1111/apt.15908</a> .                                 | Review Article                                |
| Alallam, A.; Barth, D.; Heathcote, E. J. Role of Plasmapheresis in the Treatment of Severe Pruritus in Pregnant Patients with Primary Biliary Cirrhosis: Case Reports. <i>Can J Gastroenterol</i> 2008, 22 (5), 505–507. <a href="https://doi.org/10.1155/2008/969826">https://doi.org/10.1155/2008/969826</a> . | Case Report <3 Patients                       |
| Parikh-Patel, A.; Gold, E.; Utts, J.; Gershwin, M. E. The Association between Gravidity and Primary Biliary Cirrhosis. <i>Ann Epidemiol</i> 2002, 12 (4), 264–272. <a href="https://doi.org/10.1016/s1047-2797(01)00277-0">https://doi.org/10.1016/s1047-2797(01)00277-0</a> .                                   | Wrong Outcomes                                |
| Rudi, J.; Schöning, T.; Stremmel, W. Treatment with Ursodeoxycholic Acid in Primary Biliary Cirrhosis during Pregnancy. <i>Z Gastroenterol</i> 1996, 34 (3), 188–191.                                                                                                                                            | Foreign language without ability to interpret |
| Holtmeier, J.; Leuschner, M.; Holtmeier, W.; Stiehl, A.; Klein, R.; Leuschner, U. Ursodeoxycholic Acid in the Treatment of Primary Biliary Cirrhosis (PBC) and Primary Sclerosing Cholangitis (PSC) in Pregnancy. <i>Hepatology</i> 2002, 36 (4), 491A–491A.                                                     | Wrong Outcomes                                |
| Holtmeier, J.; Leuschner, M.; Stiehl, A.; Klein, R.; Leuschner, U.; Leuschner, U.; Berg, P. A.; Holtmeier, J. Ursodeoxycholic Acid in the Treatment of Primary Biliary Cirrhosis and Primary Sclerosing Cholangitis in Pregnancy; 2002; Vol. 129A, p 74.                                                         | Review Article                                |
| Sun, Y.; Haapanen, K.; Li, B.; Zhang, W.; Van De Water, J.; Gershwin, M. E. Women and Primary Biliary Cirrhosis. <i>Clin. Rev. Allergy Immunol.</i> 2014. <a href="https://doi.org/10.1007/s12016-014-8449-4">https://doi.org/10.1007/s12016-014-8449-4</a> .                                                    | Review Article;                               |
| Sun, Y.; Haapanen, K.; Li, B.; Zhang, W.; Van de Water, J.; Gershwin, M. E. Women and Primary Biliary Cirrhosis. <i>Clin Rev Allergy Immunol</i> 2015, 48 (2–3), 285–300. <a href="https://doi.org/10.1007/s12016-014-8449-4">https://doi.org/10.1007/s12016-014-8449-4</a> .                                    | Review Article                                |

**Table S4. Assessment of quality of a Cohort study – Newcastle Ottawa Scale**

| Selection (tick one box in each section)                                                 |  |                          |
|------------------------------------------------------------------------------------------|--|--------------------------|
| 1. Representativeness of the intervention cohort                                         |  | <input type="checkbox"/> |
| a) Truly representative of the <u>average, pregnant with cholestatic liver disease</u> ★ |  | <input type="checkbox"/> |
| b) Somewhat representative of the <u>pregnant with cholestatic liver disease</u> ★       |  | <input type="checkbox"/> |
| c) Selected group of patients, <u>e.g. only certain socio-economic groups/areas</u>      |  | <input type="checkbox"/> |
| d) No description of the derivation of the cohort                                        |  |                          |
| 2. Selection of the non-intervention cohort                                              |  | <input type="checkbox"/> |
| a) Drawn from the same community as the intervention cohort ★                            |  | <input type="checkbox"/> |
| b) Drawn from a different source                                                         |  | <input type="checkbox"/> |
| c) No description of the derivation of the non-intervention cohort                       |  |                          |
| 3. Ascertainment of intervention                                                         |  | <input type="checkbox"/> |
| a) Secure record (eg health care record) ★                                               |  | <input type="checkbox"/> |
| b) Structured interview ★                                                                |  | <input type="checkbox"/> |
| c) Written self-report                                                                   |  | <input type="checkbox"/> |
| d) Other / no description                                                                |  |                          |
| 4. Demonstration that outcome of interest was not present at start of study              |  | <input type="checkbox"/> |
| a) Yes ★                                                                                 |  | <input type="checkbox"/> |
| b) No                                                                                    |  |                          |

| Comparability (tick one or both boxes, as appropriate)                                                                                                |   |                          |
|-------------------------------------------------------------------------------------------------------------------------------------------------------|---|--------------------------|
| 1. Comparability of cohorts on the basis of the design or analysis                                                                                    |   | <input type="checkbox"/> |
| a) Most important factors of adjustment ★                                                                                                             | ★ | <input type="checkbox"/> |
| b) Study controls for any additional factors                                                                                                          |   |                          |
| Outcome (tick one box in each section)                                                                                                                |   |                          |
| 1. Assessment of outcome                                                                                                                              |   | <input type="checkbox"/> |
| a) Independent blind assessment                                                                                                                       | ★ | <input type="checkbox"/> |
| b) Record linkage                                                                                                                                     | ★ | <input type="checkbox"/> |
| c) Self-report                                                                                                                                        |   | <input type="checkbox"/> |
| d) Other / no description                                                                                                                             |   |                          |
| 2. Was follow up long enough for outcomes to occur                                                                                                    |   | <input type="checkbox"/> |
| a) Yes                                                                                                                                                | ★ | <input type="checkbox"/> |
| b) No                                                                                                                                                 |   |                          |
| 3. Adequacy of follow up of cohorts                                                                                                                   |   | <input type="checkbox"/> |
| a) Complete follow up: all subjects accounted for                                                                                                     | ★ | <input type="checkbox"/> |
| b) Subjects lost to follow up unlikely to introduce bias: number lost ≤ 20%, or description of those lost suggesting no different from those followed | ★ | <input type="checkbox"/> |
| c) Follow up rate < 80% (select an adequate %) and no description of those lost                                                                       |   | <input type="checkbox"/> |
| d) No statement                                                                                                                                       |   |                          |

**Table S5. Assessment of quality of a Case-Control study – Newcastle Ottawa Scale**

| Selection (tick one box in each section)                                                                  |   |                          |
|-----------------------------------------------------------------------------------------------------------|---|--------------------------|
| 1. is the case definition adequate?                                                                       |   | <input type="checkbox"/> |
| a) Yes, with independent validation                                                                       | ★ | <input type="checkbox"/> |
| b) Yes, e.g., record linkage or based on self-report                                                      |   | <input type="checkbox"/> |
| c) No description                                                                                         |   | <input type="checkbox"/> |
| 2. Representativeness of the cases                                                                        |   | <input type="checkbox"/> |
| a) Consecutive or obviously representative series of cases                                                | ★ | <input type="checkbox"/> |
| b) Potential for selection biases or not stated                                                           |   |                          |
| 3. Selection of controls:                                                                                 |   | <input type="checkbox"/> |
| a) Controls were selected from the same source population as the cases                                    | ★ | <input type="checkbox"/> |
| b) Controls were selected from a different source population                                              |   | <input type="checkbox"/> |
| c) No description                                                                                         |   |                          |
| 4. Definition of controls:                                                                                |   | <input type="checkbox"/> |
| a) No history of disease ( <u>Cholestatic liver disease</u> )                                             | ★ | <input type="checkbox"/> |
| b) No description of source                                                                               |   | <input type="checkbox"/> |
| Comparability (tick one or both boxes, as appropriate)                                                    |   |                          |
| 1. Comparability of cases and controls on the basis of the design or analysis controlled for confounders: |   | <input type="checkbox"/> |
| a) The study controls for age                                                                             | ★ | <input type="checkbox"/> |
| b) Study controls for any additional factors ( <u>e.g. socio-economic status, education</u> )             | ★ | <input type="checkbox"/> |
| c) Cohorts are not comparable on the basis of the design or analysis controlled for confounders           |   | <input type="checkbox"/> |
| Exposure (tick one box in each section)                                                                   |   |                          |

|    |                                                               |   |                          |
|----|---------------------------------------------------------------|---|--------------------------|
| 1. | Assessment of exposure                                        |   |                          |
| a) | Secure record                                                 | ★ | <input type="checkbox"/> |
| b) | Structured interview where blind to case/control status       | ★ | <input type="checkbox"/> |
| c) | Interview not blinded to case/control status                  |   | <input type="checkbox"/> |
| d) | Written self-report or medical record only                    |   | <input type="checkbox"/> |
| e) | No description                                                |   | <input type="checkbox"/> |
| 2. | Same method of ascertainment for cases and controls:          |   |                          |
| a) | Yes                                                           | ★ | <input type="checkbox"/> |
| b) | No                                                            |   | <input type="checkbox"/> |
| 3. | Non-response rate:                                            |   |                          |
| a) | Same rate for both groups                                     | ★ | <input type="checkbox"/> |
| b) | Non-respondents described                                     |   | <input type="checkbox"/> |
| c) | Rate different between cases and controls with no description |   | <input type="checkbox"/> |

Table S6. Quality Appraisal Checklist for Case Series Studies<sup>1</sup>

| Study objective  |                                                                                                                |         |                          |
|------------------|----------------------------------------------------------------------------------------------------------------|---------|--------------------------|
| 1.               | Was the hypothesis/aim/objective of the study clearly stated?                                                  | Yes     | <input type="checkbox"/> |
|                  |                                                                                                                | Partial | <input type="checkbox"/> |
|                  |                                                                                                                | No      | <input type="checkbox"/> |
| Study design     |                                                                                                                |         |                          |
| 2.               | Was the study conducted prospectively?                                                                         | Yes     | <input type="checkbox"/> |
|                  |                                                                                                                | Unclear | <input type="checkbox"/> |
|                  |                                                                                                                | No      | <input type="checkbox"/> |
| 3.               | Were the cases collected in more than one centre?                                                              | Yes     | <input type="checkbox"/> |
|                  |                                                                                                                | Unclear | <input type="checkbox"/> |
|                  |                                                                                                                | No      | <input type="checkbox"/> |
| 4.               | Were patients recruited consecutively?                                                                         | Yes     | <input type="checkbox"/> |
|                  |                                                                                                                | Unclear | <input type="checkbox"/> |
|                  |                                                                                                                | No      | <input type="checkbox"/> |
| Study population |                                                                                                                |         |                          |
| 5.               | Were the characteristics of the patients included in the study described?                                      | Yes     | <input type="checkbox"/> |
|                  |                                                                                                                | Partial | <input type="checkbox"/> |
|                  |                                                                                                                | No      | <input type="checkbox"/> |
| 6.               | Were the eligibility criteria (i.e. inclusion and exclusion criteria) for entry into the study clearly stated? | Yes     | <input type="checkbox"/> |
|                  |                                                                                                                | Partial | <input type="checkbox"/> |
|                  |                                                                                                                | No      | <input type="checkbox"/> |
| 7.               | Did patients enter the study at a similar point in the disease?                                                | Yes     | <input type="checkbox"/> |
|                  |                                                                                                                | Unclear | <input type="checkbox"/> |
|                  |                                                                                                                | No      | <input type="checkbox"/> |
| Study population |                                                                                                                |         |                          |
| 8.               | Were relevant outcome measures established a priori?                                                           | Yes     | <input type="checkbox"/> |

|                                                   |                                                                                                   |         |                          |
|---------------------------------------------------|---------------------------------------------------------------------------------------------------|---------|--------------------------|
|                                                   |                                                                                                   | Unclear | <input type="checkbox"/> |
|                                                   |                                                                                                   | No      | <input type="checkbox"/> |
| 9.                                                | Were outcome assessors blinded to the intervention that patients received?                        | Yes     | <input type="checkbox"/> |
|                                                   |                                                                                                   | Unclear | <input type="checkbox"/> |
|                                                   |                                                                                                   | No      | <input type="checkbox"/> |
| 10.                                               | Were the relevant outcomes measured using appropriate objective/subjective methods?               | Yes     | <input type="checkbox"/> |
|                                                   |                                                                                                   | Partial | <input type="checkbox"/> |
|                                                   |                                                                                                   | No      | <input type="checkbox"/> |
| 11.                                               | Were the relevant outcome measures made before, during pregnancy and in the post-partum period?   | Yes     | <input type="checkbox"/> |
|                                                   |                                                                                                   | Unclear | <input type="checkbox"/> |
|                                                   |                                                                                                   | No      | <input type="checkbox"/> |
| <b>Statistical analysis</b>                       |                                                                                                   |         |                          |
| 12.                                               | Were the statistical tests used to assess the relevant outcomes appropriate?                      | Yes     | <input type="checkbox"/> |
|                                                   |                                                                                                   | Unclear | <input type="checkbox"/> |
|                                                   |                                                                                                   | No      | <input type="checkbox"/> |
| <b>Results and conclusions</b>                    |                                                                                                   |         |                          |
| 13.                                               | Was follow-up long enough for important events and outcomes to occur?                             | Yes     | <input type="checkbox"/> |
|                                                   |                                                                                                   | Unclear | <input type="checkbox"/> |
|                                                   |                                                                                                   | No      | <input type="checkbox"/> |
| 14.                                               | Were losses to follow-up reported?                                                                | Yes     | <input type="checkbox"/> |
|                                                   |                                                                                                   | Unclear | <input type="checkbox"/> |
|                                                   |                                                                                                   | No      | <input type="checkbox"/> |
| 15.                                               | Did the study provided estimates of random variability in the data analysis of relevant outcomes? | Yes     | <input type="checkbox"/> |
|                                                   |                                                                                                   | Partial | <input type="checkbox"/> |
|                                                   |                                                                                                   | No      | <input type="checkbox"/> |
| 16.                                               | Were the conclusions of the study supported by results?                                           | Yes     | <input type="checkbox"/> |
|                                                   |                                                                                                   | Partial | <input type="checkbox"/> |
|                                                   |                                                                                                   | No      | <input type="checkbox"/> |
| <b>Competing interests and sources of support</b> |                                                                                                   |         |                          |
| 17.                                               | Were both competing interests and sources of support for the study reported?                      | Yes     | <input type="checkbox"/> |
|                                                   |                                                                                                   | Partial | <input type="checkbox"/> |
|                                                   |                                                                                                   | No      | <input type="checkbox"/> |

<sup>1</sup> This checklist was adapted from the Institute of Health Economics (IHE) Quality Appraisal of Case Series Studies Checklist. Available from: <http://www.ihe.ca/research-programs/rmd/cssqac/cssqac-about>



Table S7. GRADE assessment for fetal outcomes in PSC pregnancies

| Certainty assessment              |               |              |               |                      |                      | № of patients  |                        | Effect                 |                                              | Certainty <sup>2</sup> | Importance |
|-----------------------------------|---------------|--------------|---------------|----------------------|----------------------|----------------|------------------------|------------------------|----------------------------------------------|------------------------|------------|
| № of studies                      | Study design  | Risk of bias | Inconsistency | Imprecision          | Other considerations | PSC            | Control                | Relative (95% CI)      | Absolute (95% CI)                            |                        |            |
| Preterm birth (assessed with: OR) |               |              |               |                      |                      |                |                        |                        |                                              |                        |            |
| 2                                 | Observational | not serious  | not serious   | serious <sup>1</sup> | strong association   | 45/263 (17.1%) | 11327/2189 4568 (0.1%) | OR 3.69 (2.65 to 5.12) | 1 more per 1,000 (from 1 more to 2 more)     | ⊕⊕○○ Low               | IMPORTANT  |
| Birth defects (assessed with: OR) |               |              |               |                      |                      |                |                        |                        |                                              |                        |            |
| 2                                 | Observational | not serious  | not serious   | serious <sup>1</sup> | strong association   | 31/453 (6.8%)  | 82853/2214 649 (3.7%)  | OR 2.25 (0.81 to 6.25) | 43 more per 1,000 (from 7 fewer to 158 more) | ⊕⊕○○ Low               | IMPORTANT  |

PSC—Primary sclerosing cholangitis; CI—Confidence Interval; OR—Odds ratio

<sup>1</sup> The effect estimate comes from only two studies with few events.

<sup>2</sup> GRADE definition:

High -Further research is very unlikely to change our confidence in the estimate of effect.

Moderate - Further research is likely to have an important impact on our confidence in the estimate of effect and may change the estimate.

Low - Further research is very likely to have an important impact on our confidence in the estimate of effect and is likely to change the estimate.

Very low -Any estimate of effect is very uncertain.

Table S8. GRADE assessment for fetal outcomes in PBC pregnancies

| Certainty assessment              |               |              |               |                      |                      | № of patients |         | Effect                 |                                             | Certainty <sup>2</sup> | Importance |
|-----------------------------------|---------------|--------------|---------------|----------------------|----------------------|---------------|---------|------------------------|---------------------------------------------|------------------------|------------|
| № of studies                      | Study design  | Risk of bias | Inconsistency | Imprecision          | Other considerations | PBC           | Control | Relative (95% CI)      | Absolute (95% CI)                           |                        |            |
| Preterm birth (assessed with: OR) |               |              |               |                      |                      |               |         |                        |                                             |                        |            |
| 2                                 | Observational | not serious  | not serious   | serious <sup>1</sup> | strong association   | 9/35 (25.7%)  | 0.0%    | OR 3.95 (2.90 to 5.38) | 0 fewer per 1,000 (from 0 fewer to 0 fewer) | ⊕⊕○○<br>Low            | IMPORTANT  |

PBC—Primary biliary cholangitis; CI—Confidence Interval; OR—Odds ratio

<sup>1</sup> The effect estimate comes from only two small studies with few events.

<sup>2</sup> GRADE definition:

High -Further research is very unlikely to change our confidence in the estimate of effect.

Moderate - Further research is likely to have an important impact on our confidence in the estimate of effect and may change the estimate.

Low - Further research is very likely to have an important impact on our confidence in the estimate of effect and is likely to change the estimate.

Very low -Any estimate of effect is very uncertain.

Table S9. GRADE assessment for pruritus in pregnant women with PBC

| № of studies                                                                 | Certainty assessment  |              |               |                      |                      | № of patients                    |                                  | Effect                           |                                                           | Certainty <sup>3</sup> | Importance |
|------------------------------------------------------------------------------|-----------------------|--------------|---------------|----------------------|----------------------|----------------------------------|----------------------------------|----------------------------------|-----------------------------------------------------------|------------------------|------------|
|                                                                              | Study design          | Risk of bias | Inconsistency | Imprecision          | Other considerations | Group 1                          | Group 2                          | Relative (95% CI)                | Absolute (95% CI)                                         |                        |            |
| <b>Pruritus during pregnancy vs before gestation (assessed with: OR)</b>     |                       |              |               |                      |                      | <b>Pruritus during pregnancy</b> | <b>Pruritus before gestation</b> |                                  |                                                           |                        |            |
| 3                                                                            | Observational studies | not serious  | not serious   | serious <sup>1</sup> | strong association   | 39/62 (62.9%)                    | 18/61 (29.5%)                    | <b>OR 4.35</b><br>(1.98 to 9.57) | <b>350 more per 1,000</b><br>(From 158 more to 505 more)  | ⊕⊕○○<br>Low            | IMPORTANT  |
| <b>Post-partum pruritus vs pruritus during pregnancy (assessed with: OR)</b> |                       |              |               |                      |                      | <b>Post-partum pruritus</b>      | <b>Pruritus during pregnancy</b> |                                  |                                                           |                        |            |
| 4                                                                            | Observational studies | not serious  | not serious   | serious <sup>2</sup> | none                 | 21/71 (29.6%)                    | 39/71 (54.9%)                    | <b>OR 0.36</b><br>(0.09 to 1.38) | <b>244 fewer per 1,000</b><br>(From 450 fewer to 78 more) | ⊕○○○<br>Very low       | IMPORTANT  |

PBC—Primary biliary cholangitis; CI—Confidence Interval; OR—Odds ratio

<sup>1</sup> The effect estimate comes from only three small studies with few events.

<sup>2</sup> The effect estimate comes from four small studies with few events.

<sup>3</sup> GRADE definition:

High -Further research is very unlikely to change our confidence in the estimate of effect.

Moderate - Further research is likely to have an important impact on our confidence in the estimate of effect and may change the estimate.

Low - Further research is very likely to have an important impact on our confidence in the estimate of effect and is likely to change the estimate.

Very low -Any estimate of effect is very uncertain.

Table S10. GRADE assessment for pruritus in pregnant women with PSC

| Certainty assessment                                                  |                       |              |               |                      |                      | № of patients |                           | Effect                    |                                                 | Certainty <sup>2</sup> | Importance |  |
|-----------------------------------------------------------------------|-----------------------|--------------|---------------|----------------------|----------------------|---------------|---------------------------|---------------------------|-------------------------------------------------|------------------------|------------|--|
| № of studies                                                          | Study design          | Risk of bias | Inconsistency | Imprecision          | Other considerations | Group 1       | Group 2                   | Relative (95% CI)         | Absolute (95% CI)                               |                        |            |  |
| Pruritus during pregnancy vs before gestation (assessed with: OR)     |                       |              |               |                      |                      |               | Pruritus during pregnancy | Pruritus before gestation |                                                 |                        |            |  |
| 3                                                                     | Observational studies | not serious  | not serious   | serious <sup>1</sup> | strong association   | 28/80 (35.0%) | 14/80 (17.5%)             | OR 2.51 (1.20 to 5.27)    | 172 more per 1,000 (From 28 more to 353 more)   | ⊕⊕○○ Low               | IMPORTANT  |  |
| Post-partum pruritus vs pruritus during pregnancy (assessed with: OR) |                       |              |               |                      |                      |               | Post-partum pruritus      | Pruritus during pregnancy |                                                 |                        |            |  |
| 3                                                                     | Observational studies | not serious  | not serious   | serious <sup>1</sup> | none                 | 16/80 (20.0%) | 28/80 (35.0%)             | OR 0.47 (0.23 to 0.96)    | 148 fewer per 1,000 (From 240 fewer to 9 fewer) | ⊕○○○ Very low          | IMPORTANT  |  |

PSC—Primary sclerosing cholangitis; CI—Confidence Interval; OR—Odds ratio

<sup>1</sup> The effect estimate comes from only three small studies with few events.

<sup>2</sup>GRADE definition:

High -Further research is very unlikely to change our confidence in the estimate of effect.

Moderate - Further research is likely to have an important impact on our confidence in the estimate of effect and may change the estimate.

Low - Further research is very likely to have an important impact on our confidence in the estimate of effect and is likely to change the estimate.

Very low -Any estimate of effect is very uncertain.

**Table S11. GRADE assessment for Biochemical flare during postpartum in PBC and PSC**

| Certainty assessment                                  |              |              |               |             |                      | No of patients |                  | Effect            |                   | Certainty <sup>3</sup> | Importance |
|-------------------------------------------------------|--------------|--------------|---------------|-------------|----------------------|----------------|------------------|-------------------|-------------------|------------------------|------------|
| No of studies                                         | Study design | Risk of bias | Inconsistency | Imprecision | Other considerations | Post-partum    | During pregnancy | Relative (95% CI) | Absolute (95% CI) |                        |            |
| Biochemical flare in PBC patients (assessed with: OR) |              |              |               |             |                      |                |                  |                   |                   |                        |            |

|                                                              |               |             |             |                      |      |                  |                  |                                  |                                                                      |                      |           |
|--------------------------------------------------------------|---------------|-------------|-------------|----------------------|------|------------------|------------------|----------------------------------|----------------------------------------------------------------------|----------------------|-----------|
| 3                                                            | Observational | not serious | not serious | serious <sup>1</sup> | none | 38/62<br>(61.3%) | 16/53<br>(30.2%) | <b>OR 2.00</b><br>(1.27 to 3.13) | <b>162 more<br/>per 1,000<br/>(from 53<br/>more to<br/>273 more)</b> | ⊕○○<br>○<br>Very low | IMPORTANT |
| <b>Biochemical flare in PSC patients (assessed with: OR)</b> |               |             |             |                      |      |                  |                  |                                  |                                                                      |                      |           |
| 2                                                            | Observational | not serious | not serious | serious <sup>2</sup> | none | 14/38<br>(36.8%) | 7/38<br>(18.4%)  | <b>OR 1.99</b><br>(1.34 to 2.94) | <b>126 more<br/>per 1,000<br/>(from 48<br/>more to<br/>215 more)</b> | ⊕○○<br>○<br>Very low | IMPORTANT |

PBC—Primary biliary cholangitis; PSC—Primary sclerosing cholangitis; CI—Confidence Interval; OR—Odds ratio

<sup>1</sup> The effect estimate comes from only three small studies with few events.

<sup>2</sup> The effect estimate comes from only two small studies with few events.

<sup>3</sup> GRADE definition:

High -Further research is very unlikely to change our confidence in the estimate of effect.

Moderate - Further research is likely to have an important impact on our confidence in the estimate of effect and may change the estimate.

Low - Further research is very likely to have an important impact on our confidence in the estimate of effect and is likely to change the estimate.

Very low -Any estimate of effect is very uncertain.
